# Supplementary material
Source: PubMed Central journal article supplement (PMC9009844)
Supplement: hhf-15-e008935-s001.pdf [file hhf-15-e008935-s001.pdf]

## Supplemental Material

## Supplemental Figures and Figure Legends I-III

## Supplemental Figure I. Flowchart

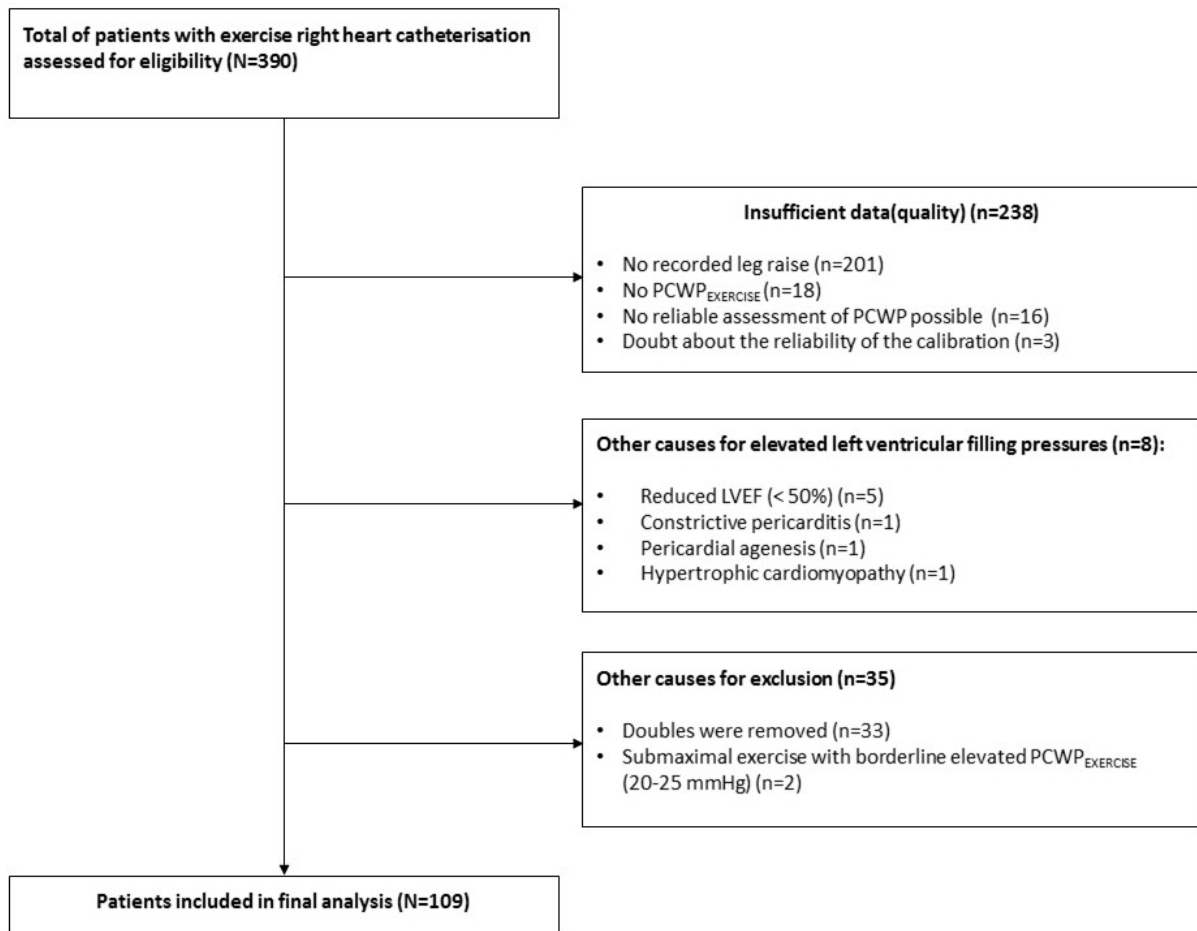

*Supplemental Figure I Legend:* Abbreviations: PCWP, pulmonary capillary wedge pressure; PCWP<sub>EXERCISE</sub>, PCWP at peak exertion; LVEF, left ventricular ejection fraction.

Supplemental Figure II. ROC-curve analysis to diagnose HFpEF (occult- and manifest-HFpEF combined)

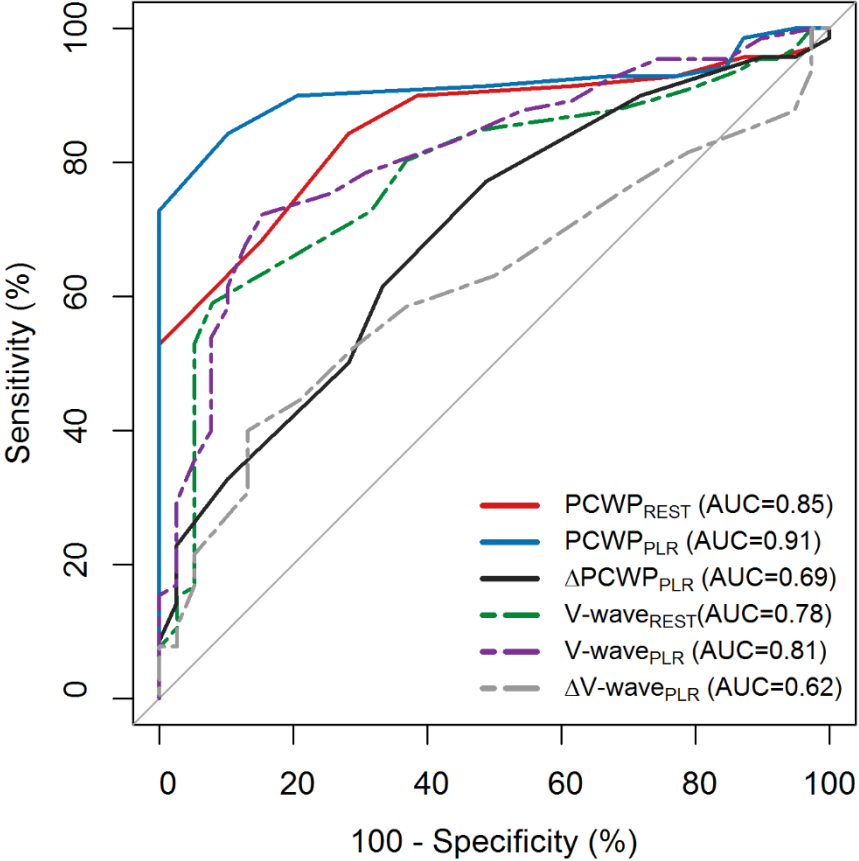

Supplemental Figure II Legend: Abbreviations: AUC, area under the curve; PCWP, pulmonary capillary wedge pressure; PLR, passive leg raise.

**Supplemental Figure III. Influence of diuretics to diagnose HFpEF (occult- and manifest-HFpEF combined)**

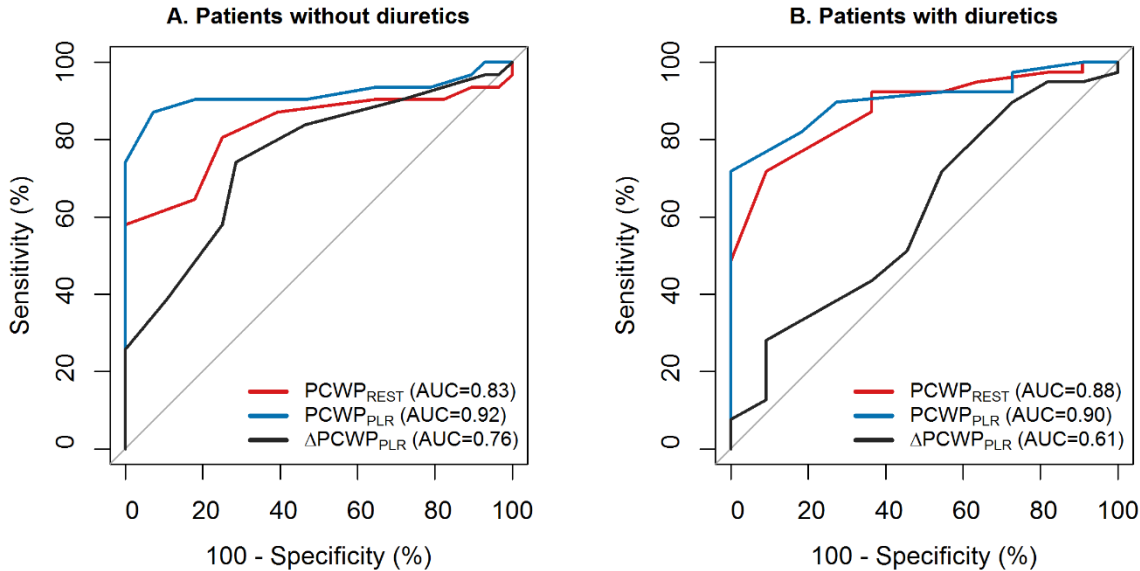

*Supplemental Figure III Legend:* Abbreviations: AUC, area under the curve; PCWP, pulmonary capillary wedge pressure; PLR, passive leg raise.

**Supplemental Tables I-II**

**Supplemental Table I. Diagnoses of non-HFpEF patients**

| <b>Diagnoses</b>                | <b>n = 39</b> |
|---------------------------------|---------------|
| CTEPH                           | 6 (15%)       |
| CTED                            | 7 (18%)       |
| IPAH                            | 6 (15%)       |
| Asymptomatic PH-gene carriers   | 4 (10%)       |
| Dyspnea e.c.i.                  | 4 (10%)       |
| Deconditioning / Obesity        | 4 (10%)       |
| Fatigue post-pulmonary embolism | 2 (5%)        |
| Symptomatic atrial fibrillation | 1 (3%)        |
| Diffusion-disorder with MCTD    | 1 (3%)        |
| Dilated pulmonary artery e.c.i. | 1 (3%)        |
| Post-viral dyspnea              | 1 (3%)        |
| OSAS                            | 1 (3%)        |
| PVOD                            | 1 (3%)        |

*Subtext Supplemental Table I:* Abbreviations: CTEPH, chronic trombo-embolic pulmonary hypertension; CTED, chronic thrombo-embolic disease; IPAH, idiopathic pulmonary arterial hypertension; PH, pulmonary hypertension; e.c.i., e cause ignota; MCTD, mixed connective tissue disease; OSAS, obstructive sleep apnea syndrome; PVOD, pulmonary veno-occlusive disease.

**Supplemental Table II. Data external validation cohort**

|                                 | <b>non-HFpEF (n=24)</b> | <b>occult-HFpEF (n=18)</b> |
|---------------------------------|-------------------------|----------------------------|
| Age (years)                     | 61 (12)                 | 72 (9)                     |
| Gender (female)                 | 11 (46%)                | 7 (39%)                    |
| BMI                             | 27.2 (4.4)              | 33.0 (6.0)                 |
| <b>NYHA</b>                     |                         |                            |
| 1                               | 2 (8%)                  | 0 (0%)                     |
| 2                               | 14 (58%)                | 9 (50%)                    |
| 3                               | 7 (29%)                 | 9 (50%)                    |
| 4                               | 1 (4%)                  | 0 (0%)                     |
| <b>H<sub>2</sub>FPEF score</b>  |                         |                            |
| Low (0-1)                       | 8 (33%)                 | 0 (0%)                     |
| Intermediate (2-5)              | 16 (67%)                | 13 (72%)                   |
| High likelihood (6-9)           | 0 (0%)                  | 5 (28%)                    |
| <b>PCWP measurements</b>        |                         |                            |
| PCWP <sub>REST</sub> (mmHg)     | 8 [6, 9]                | 12 [10, 13]                |
| PCWP <sub>PLR</sub> (mmHg)      | 12[10-13]               | 20 [16-22]                 |
| PCWP <sub>EXERCISE</sub> (mmHg) | 15[12-17]               | 30 [27-34]                 |

*Subtext Supplemental Table II:* Abbreviations: PCWP<sub>REST</sub>, pulmonary capillary wedge pressure at rest;

PCWP<sub>PLR</sub>, PCWP at passive leg raise;
